# Supplementary material for: The Influence of Immune Heterogeneity on the Effectiveness of Immune Checkpoint Inhibitors in Multifocal Hepatocellular Carcinomas
Source: Oxford University Press journal article supplement (doi:10.1158/1078-0432.ccr-19-3840), 2020-06-11
Supplement: 10780432ccr193840-sup-232916_3_supp_6265216_q9k5tx.docx [file 10780432ccr193840-sup-232916_3_supp_6265216_q9k5tx.docx]

**Supplementary Tables**

Supplementary Table S1. Clinicopathologic information of 12 multifocal HCC patients.

Supplementary Table S2. PCR primers used for validation of HBV integration sites.

Supplementary Table S4. HBV integration analysis in WGS samples.

Supplementary Table S8. *P*-value of ssGSEA analysis.

Supplementary Table S10.Correlation between the number of rearrangements and immune activity.

Supplementary Table S11. Detailed clinical data of patients with anti-PD-1 therapy.

**Supplementary Table S1. Clinicopathologic information of 12 multifocal HCC patients.**

| **Patient ID** | **Gender** | **Age** | **Viral**  **infection** | **HBV (IU/ml)** | **Tumor number** | **The longest diameter (cm)** | | **AFP (ug/L)** | **OS**  **(days)** | **Antiviral therapy**  **(Before surgery)** |
| --- | --- | --- | --- | --- | --- | --- | --- | --- | --- | --- |
| **Large tumor** | **Small tumors** |
| HCC372 | Male | 43 | HBV | 4410 | 2 | 18 | 1 | 37571 | 195 | No |
| HCC374 | Female | 46 | HBV | 884000 | 2 | 12 | 1 | 471206 | 424 | No |
| HCC393 | Male | 32 | HBV | 83800 | 2 | 13 | 1 | 1336 | 566 | No |
| HCC401 | Male | 73 | HBV | 15400 | 2 | 5 | 1 | 139 | 325 | No |
| HCC406 | Male | 32 | HBV | 10000 | 2 | 16 | 7 | 259 | 432 | No |
| HCC416 | Male | 37 | HBV | <100 | 2 | 13 | 1.5 | 17069 | 133 | Yes |
| HCC591 | Male | 44 | HBV | 520000 | 5 | 8.5 | 1.8; 1.5; 1; 1 | 2383 | 251 | No |
| HCC612 | Male | 44 | HBV | <100 | 7 | 13.1 | 4.5; 3; 3; 2; 2; 1 | 9 | 293 | No |
| HCC624 | Male | 65 | HBV | 101 | 5 | 10.4 | 5.4; 4; 2; 1 | 431 | 90 | No |
| HCC642 | Male | 46 | HCV | <100 | 6 | 6 | 1; 1; 1; 1; 1 | 1040 | 127 | No |
| HCC817 | Male | 65 | HBV | 966 | 7 | 10 | 2.5; 2; 2; 1; 1; 1 | 731 | 180 | No |
| HCC1030 | Female | 61 | HBV | <100 | 3 | 5 | 1; 1 | 343582 | 56 | No |

NOTE: All the 12 patients were classified as Child-Pugh class A liver function.

**Supplementary Table S2. PCR primers used for validation of HBV integration sites.**

| **HBV integration sites** | **primers** |
| --- | --- |
| HCC372-site 1-F | TCTTTGTACTGGGAGGCTGTAG |
| HCC372-site 1-R | AGAACCTGTGGGCTCTGATT |
| Length | 161bp |
|  |  |
| HCC372-site 2-F | TTGTGGGAAAGCAGGGAAGT |
| HCC372-site 2-R | TATGCCTCAAGGTCGGTCGT |
| Length | 217bp |
|  |  |
| HCC374-site 1-F | AGGAGTTGGGGGAGGAGATT |
| HCC374-site 1-R | TGGAAGGTGAAGGGGCAG |
| Length | 166bp |
|  |  |
| HCC374-site 2-F | AAGATGAGGCATAGCAGCAGGA |
| HCC374-site 2-R | TGGGTGATTAACAGATTTGGGG |
| Length | 125bp |
|  |  |
| HCC406-site 1-F | TCGGCTGTGCTGCCAACT |
| HCC406-site 1-R | GAAGCAGAAGATTATGCTGGAGT |
| Length | 176bp |
|  |  |
| HCC406-site 2-F | AGTATTATGGGTGCAGTTAGTGTG |
| HCC406-site 2-R | GTCAGAAGGCAAAAAAGAGAGTAC |
| Length | 142bp |
|  |  |
| HCC416-F | GATTAGATTAAAGGTCTTTGTACTG |
| HCC416-R | CTTATTTTAGATTAAGTGGTTAATTAC |
| Length | 215bp |

**Supplementary Table S4. HBV integration analysis in WGS samples.**

| **Integration_ID** | **Sample** | **Left_chr** | **Left_pos** | **Left_strand** | **Right_chr** | **Right_pos** | **Right_strand** |
| --- | --- | --- | --- | --- | --- | --- | --- |
| HCC372-site 1 | HCC372 | HBV | 179 | + | chr19 | 36213899 | + |
| HCC372-site 2 | chr19 | 36213896 | + | HBV | 1564 | + |
| HCC374-site 1 | HCC374 | HBV | 1819 | + | chr5 | 1295396 | - |
| HCC374-site 2 | HBV | 359 | - | chr5 | 1295854 | + |
| HCC406-site 1 | HCC406 | HBV | 1501 | + | chr5 | 1296741 | - |
| HCC406-site 2 | chr5 | 1296816 | + | HBV | 1862 | + |
| HCC416 | HCC416 | HBV | 1829 | + | chr5 | 1301895 | - |

**Supplementary Table S8. *P*-value of ssGSEA analysis.**

| **Pathways** | ***P*-value** | **FDR** |
| --- | --- | --- |
| ANGIOGENESIS | 1.16009E-05 | 9.39498E-05 |
| VEGF_SIGNALING_PATHWAY | 1.39469E-05 | 9.39498E-05 |
| HEDGEHOG_SIGNALING_PATHWAY | 1.78952E-05 | 9.39498E-05 |
| MYC_TARGETS_V1 | 1.51736E-05 | 9.39498E-05 |
| PI3K_AKT_MTOR_SIGNALING | 0.000500642 | 0.001501926 |
| TNFA_SIGNALING_VIA_NFKB | 0.001331536 | 0.002542023 |
| INTERFERON_ALPHA_RESPONSE | 0.000329788 | 0.00138511 |
| ALLOGRAFT_REJECTION | 0.001072248 | 0.002542023 |
| INFLAMMATORY_RESPONSE | 0.001189869 | 0.002542023 |
| T_CELL_RECEPTOR_SIGNALING_PATHWAY | 0.000431063 | 0.001501926 |
| B_CELL_RECEPTOR_SIGNALING_PATHWAY | 0.001304862 | 0.002542023 |
| T_CELL_SIGNAL_TRANSDUCTION | 0.003474354 | 0.005612418 |
| CD8_TCR_PATHWAY | 0.033794325 | 0.041103272 |
| POSITIVE_REGULATION_OF_IL_8_SECRETION | 0.035231376 | 0.041103272 |
| REGULATION_OF_IL_1_BETA_PRODUCTION | 0.017000852 | 0.023801193 |
| CHRONIC_INFLAMMATORY_RESPONSE | 0.014484034 | 0.021726051 |
| REGULATION_OF_IL_1_SECRETION | 0.032244883 | 0.041103272 |
| Immune Stimulator Genes | 0.00160812 | 0.00281421 |
| Immune Inhibitor Genes | 0.133833765 | 0.140525453 |
| 28-Gene_IFN_Signature | 0.048364116 | 0.053455076 |

**Supplementary Table S10. Correlation between the number of rearrangements and immune activity.**

| **Immune Activity** | **Coefficient** | ***P*-value** |
| --- | --- | --- |
| TNFA_SIGNALING_VIA_NFKB | -0.2534278 | 0.4267 |
| INTERFERON_ALPHA_RESPONSE | 0.3379722 | 0.2826 |
| ALLOGRAFT_REJECTION | 0.1811048 | 0.5732 |
| INFLAMMATORY_RESPONSE | -2.44E-05 | 0.9999 |
| T_CELL_RECEPTOR_SIGNALING_PATHWAY | 0.2708072 | 0.3946 |
| B_CELL_RECEPTOR_SIGNALING_PATHWAY | -0.3012526 | 0.3413 |
| T_CELL_SIGNAL_TRANSDUCTION | -0.4395263 | 0.1528 |
| CD8_TCR_PATHWAY | -0.2662332 | 0.4029 |
| POSITIVE_REGULATION_OF_IL_8_SECRETION | 0.05891741 | 0.8557 |
| REGULATION_OF_IL_1_BETA_PRODUCTION | -0.2947776 | 0.3523 |
| CHRONIC_INFLAMMATORY_RESPONSE | -0.1530027 | 0.635 |
| REGULATION_OF_IL_1_SECRETION | 0.09396505 | 0.7715 |
| B cells naive | 0.2743534 | 0.3882 |
| T cells CD8 | -0.3390697 | 0.281 |
| T cells regulatory (Tregs) | -0.1979378 | 0.5375 |
| Monocytes | -0.2217346 | 0.4886 |
| Macrophages M1 | -0.3406833 | 0.2785 |
| Macrophages M2 | -0.4131434 | 0.1819 |

| **Case** |  | **Treatment** |  | **The longest diameter of large tumor** | | |  | **The longest diameter of small tumor** | | |
| --- | --- | --- | --- | --- | --- | --- | --- | --- | --- | --- |
|  |  | **Pre-treatment**  **(cm)** | **Post-treatment**  **(cm)** | **Treatment**  **response** |  | **Pre-treatment**  **(cm)** | **Post-treatment**  **(cm)** | **Treatment**  **response** |
| Case 1 |  | Anti-PD-1 monotherapy |  | 2.24 | 2.89 | SD |  | 1.43 | 0.59 | PR |
| Case 2 |  | Anti-PD-1 monotherapy |  | 7.0 | 10.31 | PD |  | 1.12 | 0.4 | PR |
| Case 3 |  | Anti-PD-1 monotherapy |  | 7.07 | 8.12 | SD |  | 1.34 | 0.72 | PR |
| Case 4 |  | Anti-PD-1 monotherapy |  | 2.35 | 2.36 | SD |  | 1.51 | 0.75 | PR |
| Case 5 |  | Anti-PD-1 monotherapy |  | 6.76 | 9.24 | PD |  | 1.75 | 1.76 | SD |
| Case 6 |  | Anti-PD-1 monotherapy |  | 5.06 | 5.22 | SD |  | 3.12 | 3.06 | SD |
| Case 7 |  | Anti-PD-1 monotherapy |  | 2.59 | 2.41 | SD |  | 1.43 | 1.33 | SD |
| Case 8 |  | Combination therapy of  anti-PD-1 and lenvatinib |  | 7.05 | 2.89 | PR |  | 3.05 | 0 | CR |

**Supplementary Table S11.** **Detailed clinical data of patients with anti-PD-1 therapy.**

**Notes:** The first seven cases (Case 1 to Case 7) were patients with anti-PD-1 monotherapy. Among them, five cases (Case1 to Case 5) showed various treatment responses in different foci, with a better response in the small tumor than the large tumor, while the small and large tumors were both evaluated as SD in other two cases (Case 6 and Case 7).

Abbreviations: PD, progressive disease; SD, stable disease; PR, partial response; CR, complete response.
