# Supplementary material for: The Influence of Immune Heterogeneity on the Effectiveness of Immune Checkpoint Inhibitors in Multifocal Hepatocellular Carcinomas
Source: Oxford University Press journal article supplement (doi:10.1158/1078-0432.ccr-19-3840), 2020-06-11
Supplement: 10780432ccr193840-sup-232916_3_supp_6265221_q9k4xv.xls [file 10780432ccr193840-sup-232916_3_supp_6265221_q9k4xv.xls]

## Sheet: table 1
Sample	Gene affected	Transcript affected	CDS mutation	Amino acid change	Mutation type	Chromosome	Start	End	Allele change	SIFT	Polyphen2
HCC372 Large tumor	BRAF	NM_004333	c.T1782A	p.D594E	missense	chr7	140453153	140453153	A>T	0.001	1
HCC372 Large tumor	CISH	NM_145071	c.A695G	p.N232S	missense	chr3	50645120	50645120	T>C	0.003	0.998
HCC372 Large tumor	PGR	NM_000926	c.G1868A	p.R623H	missense	chr11	100962529	100962529	C>T	0	1
HCC372 Large tumor	SCARF1	NM_003693	c.G995A	p.G332D	missense	chr17	1543757	1543757	C>T	0	1
HCC372 Small tumor	BRAF	NM_004333	c.T1782A	p.D594E	missense	chr7	140453153	140453153	A>T	0.001	1
HCC372 Small tumor	CISH	NM_145071	c.A695G	p.N232S	missense	chr3	50645120	50645120	T>C	0.003	0.998
HCC374 Large tumor	CD5L	NM_001347698	c.G200A	p.C67Y	missense	chr1	157805801	157805801	C>T	0	1
HCC374 Large tumor	CFTR	NM_000492	c.T946A	p.F316I	missense	chr7	117180230	117180230	T>A	0.006	0.913
HCC374 Large tumor	PSMD7	NM_002811	c.T515C	p.V172A	missense	chr16	74338277	74338277	T>C	0	0.999
HCC374 Large tumor	RETN	NM_001193374	c.G205C	p.V69L	missense	chr19	7735113	7735113	G>C	0.011	0.999
HCC374 Small tumor	CD5L	NM_001347698	c.G200A	p.C67Y	missense	chr1	157805801	157805801	C>T	0	1
HCC374 Small tumor	CFTR	NM_000492	c.T946A	p.F316I	missense	chr7	117180230	117180230	T>A	0.006	0.913
HCC374 Small tumor	PSMD7	NM_002811	c.T515C	p.V172A	missense	chr16	74338277	74338277	T>C	0	0.999
HCC374 Small tumor	TP53	NM_001126115	c.G351T	p.R117S	missense	chr17	7577534	7577534	C>A	0.009	0.996
HCC393 Large tumor	CSF1R	NM_001288705	c.C1862T	p.T621M	missense	chr5	149440532	149440532	G>A	0.005	1
HCC393 Small tumor	CSF1R	NM_001288705	c.C1862T	p.T621M	missense	chr5	149440532	149440532	G>A	0.005	1
HCC401 Large tumor	ANKRD17	NM_198889	c.G6619A	p.G2207S	missense	chr4	73944395	73944395	C>T	0	1
HCC401 Large tumor	APOBEC3C	NM_014508	c.G17T	p.R6I	missense	chr22	39410384	39410384	G>T	0.001	1
HCC401 Large tumor	CARD11	NM_032415	c.T977A	p.L326Q	missense	chr7	2978353	2978353	A>T	0.001	1
HCC401 Large tumor	CFH	NM_000186	c.A433T	p.K145X	nonsense	chr1	196646611	196646611	A>T	.	.
HCC401 Large tumor	CR2	NM_001877	c.T2729A	p.V910E	missense	chr1	207651233	207651233	T>A	0.024	0.944
HCC401 Large tumor	CRLF3	NM_015986	c.T1217C	p.I406T	missense	chr17	29111317	29111317	A>G	0	1
HCC401 Large tumor	CTNNB1	NM_001098209	c.G94T	p.D32Y	missense	chr3	41266097	41266097	G>T	0	1
HCC401 Large tumor	HSPA6	NM_002155	c.G750T	p.K250N	missense	chr1	161495198	161495198	G>T	0.006	1
HCC401 Large tumor	HTR3D	NM_001145143	c.A379T	p.R127X	nonsense	chr3	183754547	183754547	A>T	.	.
HCC401 Large tumor	KAT2B	NM_003884	c.A889T	p.S297C	missense	chr3	20153125	20153125	A>T	0.001	1
HCC401 Large tumor	KIR3DL3	NM_153443	c.A235T	p.S79C	missense	chr19	55237683	55237683	A>T	0	0.993
HCC401 Large tumor	MAPT	NM_016834	c.A587T	p.K196M	missense	chr17	44073969	44073969	A>T	0	1
HCC401 Large tumor	MID2	NM_012216	c.C119A	p.P40H	missense	chrX	107084014	107084014	C>A	0	1
HCC401 Large tumor	MUC4	NM_018406	c.C9548T	p.T3183M	missense	chr3	195508903	195508903	G>A	0.02	0.997
HCC401 Large tumor	PAK4	NM_005884	c.1099-1G>A	-	splicing	chr19	39665570	39665570	G>A	-	-
HCC401 Large tumor	PLCL1	NM_006226	c.A461T	p.E154V	missense	chr2	198948702	198948702	A>T	0.003	0.961
HCC401 Large tumor	PLXNA4	NM_020911	c.T4658A	p.L1553Q	missense	chr7	131844234	131844234	A>T	0	1
HCC401 Large tumor	POSTN	NM_001135935	c.1661-2A>T	-	splicing	chr13	38153498	38153498	T>A	-	-
HCC401 Large tumor	PTGS2	NM_000963	c.T871C	p.W291R	missense	chr1	186645698	186645698	A>G	0	1
HCC401 Large tumor	PTH1R	NM_001184744	c.A1342T	p.N448Y	missense	chr3	46944146	46944146	A>T	0.003	1
HCC401 Large tumor	S100A7A	NM_176823	c.T2C	p.M1T	missense	chr1	153390560	153390560	T>C	0.003	0.967
HCC401 Large tumor	SLIT1	NM_003061	c.A1424C	p.K475T	missense	chr10	98808753	98808753	T>G	0.001	1
HCC401 Large tumor	TG	NM_003235	c.C7111T	p.R2371X	nonsense	chr8	134042140	134042140	C>T	.	.
HCC401 Large tumor	THEM4	NM_053055	c.A397G	p.R133G	missense	chr1	151861739	151861739	T>C	0.006	0.997
HCC401 Large tumor	TINAGL1	NM_001204414	c.G236A	p.R79H	missense	chr1	32042985	32042985	G>A	0.049	1
HCC401 Large tumor	TRAF6	NM_004620	c.G181T	p.D61Y	missense	chr11	36522885	36522885	C>A	0.025	0.999
HCC401 Large tumor	UMODL1	NM_001004416	c.C643A	p.H215N	missense	chr21	43508443	43508443	C>A	0.019	0.998
HCC401 Large tumor	ZC3H12A	NM_001323550	c.A439G	p.M147V	missense	chr1	37941536	37941536	A>G	0.002	0.998
HCC401 Small tumor	ANKRD17	NM_198889	c.G6619A	p.G2207S	missense	chr4	73944395	73944395	C>T	0	1
HCC401 Small tumor	APOBEC3C	NM_014508	c.G17T	p.R6I	missense	chr22	39410384	39410384	G>T	0.001	1
HCC401 Small tumor	CARD11	NM_032415	c.T977A	p.L326Q	missense	chr7	2978353	2978353	A>T	0.001	1
HCC401 Small tumor	CFH	NM_000186	c.A433T	p.K145X	nonsense	chr1	196646611	196646611	A>T	.	.
HCC401 Small tumor	CR2	NM_001877	c.T2729A	p.V910E	missense	chr1	207651233	207651233	T>A	0.024	0.944
HCC401 Small tumor	CRLF3	NM_015986	c.T1217C	p.I406T	missense	chr17	29111317	29111317	A>G	0	1
HCC401 Small tumor	CTNNB1	NM_001098209	c.G94T	p.D32Y	missense	chr3	41266097	41266097	G>T	0	1
HCC401 Small tumor	DDX21	NM_001256910	c.G528T	p.L176F	missense	chr10	70723171	70723171	G>T	0.004	0.999
HCC401 Small tumor	HSPA6	NM_002155	c.G750T	p.K250N	missense	chr1	161495198	161495198	G>T	0.006	1
HCC401 Small tumor	HTR3D	NM_001145143	c.A379T	p.R127X	nonsense	chr3	183754547	183754547	A>T	.	.
HCC401 Small tumor	KAT2B	NM_003884	c.A889T	p.S297C	missense	chr3	20153125	20153125	A>T	0.001	1
HCC401 Small tumor	KIR3DL3	NM_153443	c.A235T	p.S79C	missense	chr19	55237683	55237683	A>T	0	0.993
HCC401 Small tumor	MAPT	NM_016834	c.A587T	p.K196M	missense	chr17	44073969	44073969	A>T	0	1
HCC401 Small tumor	MID2	NM_012216	c.C119A	p.P40H	missense	chrX	107084014	107084014	C>A	0	1
HCC401 Small tumor	MUC4	NM_018406	c.C9548T	p.T3183M	missense	chr3	195508903	195508903	G>A	0.02	0.997
HCC401 Small tumor	PAK4	NM_005884	c.1099-1G>A	-	splicing	chr19	39665570	39665570	G>A	-	-
HCC401 Small tumor	PLCL1	NM_006226	c.A461T	p.E154V	missense	chr2	198948702	198948702	A>T	0.003	0.961
HCC401 Small tumor	PLXNA4	NM_020911	c.T4658A	p.L1553Q	missense	chr7	131844234	131844234	A>T	0	1
HCC401 Small tumor	POSTN	NM_001135935	c.1661-2A>T	-	splicing	chr13	38153498	38153498	T>A	-	-
HCC401 Small tumor	PTGS2	NM_000963	c.T871C	p.W291R	missense	chr1	186645698	186645698	A>G	0	1
HCC401 Small tumor	PTH1R	NM_001184744	c.A1342T	p.N448Y	missense	chr3	46944146	46944146	A>T	0.003	1
HCC401 Small tumor	S100A7A	NM_176823	c.T2C	p.M1T	missense	chr1	153390560	153390560	T>C	0.003	0.967
HCC401 Small tumor	SLIT1	NM_003061	c.A1424C	p.K475T	missense	chr10	98808753	98808753	T>G	0.001	1
HCC401 Small tumor	SMARCA2	NM_001289398	c.G232A	p.G78R	missense	chr9	2181575	2181575	G>A	0.008	0.957
HCC401 Small tumor	TG	NM_003235	c.C7111T	p.R2371X	nonsense	chr8	134042140	134042140	C>T	.	.
HCC401 Small tumor	THEM4	NM_053055	c.A397G	p.R133G	missense	chr1	151861739	151861739	T>C	0.006	0.997
HCC401 Small tumor	TINAGL1	NM_001204414	c.G236A	p.R79H	missense	chr1	32042985	32042985	G>A	0.049	1
HCC401 Small tumor	TRAF6	NM_004620	c.G181T	p.D61Y	missense	chr11	36522885	36522885	C>A	0.025	0.999
HCC401 Small tumor	UMODL1	NM_001004416	c.C643A	p.H215N	missense	chr21	43508443	43508443	C>A	0.019	0.998
HCC401 Small tumor	ZC3H12A	NM_001323550	c.A439G	p.M147V	missense	chr1	37941536	37941536	A>G	0.002	0.998
HCC406 Large tumor	CTNNB1	NM_001098209	c.C98A	p.S33Y	missense	chr3	41266101	41266101	C>A	0	1
HCC406 Large tumor	MUC4	NM_018406	c.C7196A	p.T2399N	missense	chr3	195511255	195511255	G>T	0	0.898
HCC406 Large tumor	NRG1	NM_001322197	c.T1078A	p.L360M	missense	chr8	32621546	32621546	T>A	0.005	1
HCC406 Large tumor	TP53	NM_001126115	c.G351T	p.R117S	missense	chr17	7577534	7577534	C>A	0.009	0.996
HCC406 Large tumor	TRPM2	NM_001320350	c.C1489T	p.P497S	missense	chr21	45811203	45811203	C>T	0.027	0.995
HCC406 Small tumor	CTNNB1	NM_001098209	c.C98A	p.S33Y	missense	chr3	41266101	41266101	C>A	0	1
HCC406 Small tumor	MUC4	NM_018406	c.C7196A	p.T2399N	missense	chr3	195511255	195511255	G>T	0	0.898
HCC406 Small tumor	NRG1	NM_001322197	c.T1078A	p.L360M	missense	chr8	32621546	32621546	T>A	0.005	1
HCC406 Small tumor	TP53	NM_001126115	c.G351T	p.R117S	missense	chr17	7577534	7577534	C>A	0.009	0.996
HCC406 Small tumor	TRPM2	NM_001320350	c.C1489T	p.P497S	missense	chr21	45811203	45811203	C>T	0.027	0.995
HCC416 Large tumor	FCGR2A	NM_001136219	c.780+1G>A	-	splicing	chr1	161483723	161483723	G>A	-	-
HCC416 Large tumor	HTR3D	NM_001145143	c.197+1G>A	-	splicing	chr3	183753889	183753889	G>A	-	-
HCC416 Large tumor	MASP2	NM_006610	c.A2012C	p.K671T	missense	chr1	11086991	11086991	T>G	0.023	0.93
HCC416 Large tumor	MASP2	NM_006610	c.A2006C	p.Y669S	missense	chr1	11086997	11086997	T>G	0	1
HCC416 Large tumor	SMARCA4	NM_001128845	c.G3546T	p.Q1182H	missense	chr19	11141569	11141569	G>T	0	1
HCC416 Large tumor	TP53	NM_001126118	c.A260G	p.Y87C	missense	chr17	7578553	7578553	T>C	0	1
HCC416 Small tumor	FCGR2A	NM_001136219	c.780+1G>A	-	splicing	chr1	161483723	161483723	G>A	-	-
HCC416 Small tumor	HTR3D	NM_001145143	c.197+1G>A	-	splicing	chr3	183753889	183753889	G>A	-	-
HCC416 Small tumor	MASP2	NM_006610	c.A2012C	p.K671T	missense	chr1	11086991	11086991	T>G	0.023	0.93
HCC416 Small tumor	MASP2	NM_006610	c.A2006C	p.Y669S	missense	chr1	11086997	11086997	T>G	0	1
HCC416 Small tumor	MUC4	NM_018406	c.C9280T	p.L3094F	missense	chr3	195509171	195509171	G>A	0.043	0.898
HCC416 Small tumor	SMARCA4	NM_001128845	c.G3546T	p.Q1182H	missense	chr19	11141569	11141569	G>T	0	1
HCC416 Small tumor	TP53	NM_001126118	c.A260G	p.Y87C	missense	chr17	7578553	7578553	T>C	0	1
Note: Genes in highlight are specific mutations in the small tumor or large tumor.
